# Supplementary material
Source: publisher figshare collection journal article supplement (https://asha.figshare.com/articles/dataset/_/14111837)
Supplement: Supplementary file 1 [file 1]

**Supplemental Material S1.** Communication diagnosis at initial visit in the Neurodegenerative Research Lab and at the current visit for participants with PSP-SL variant.

| Subject # | Initial Visit |          |        |                 |                     | Current Visit |          |        |                     |                     |
|-----------|---------------|----------|--------|-----------------|---------------------|---------------|----------|--------|---------------------|---------------------|
|           | AOS Severity  | AOS Type | ASRS-3 | Dysarthria Type | Dysarthria Severity | AOS Severity  | AOS Type | ASRS-3 | Dysarthria Type     | Dysarthria Severity |
| 48        | Moderate      | Prosodic | 25     | Spastic         | Mild                | Profound      | Mixed    | 44     | Spastic             | Severe              |
| 50        | Severe        | Phonetic | 29     |                 |                     | Profound      | Mixed    |        | Hypokinetic         | Severe              |
| 51        | Mild          | Mixed    | 8      |                 |                     | Profound      | Mixed    |        | Spastic             | Moderate            |
| 54        | Moderate      | Prosodic | 18     | Spastic         | Moderate            | Moderate      | Prosodic | 19     | Spastic             | Severe              |
| 58        | Severe        | Phonetic | 23     | Spastic         | Mild                | Profound      | Phonetic |        | Spastic             | Moderate            |
| 59        | Mild          | Prosodic | 17     |                 |                     | Severe        | Prosodic | 26     | Spastic             | Severe              |
| 63        | Profound      | Mixed    | 38     |                 |                     | Profound      | Mixed    |        |                     |                     |
| 75        | Mild          | Prosodic | 22     |                 |                     | Profound      | Mixed    | 49     | Hypokinetic-spastic | Mild                |
