# Supplementary material
Source: publisher figshare collection journal article supplement (https://asha.figshare.com/articles/dataset/_/14111837)
Supplement: Supplementary file 2 [file 1]

## Supplemental Material S2. Post hoc ROC analysis of the current data set.

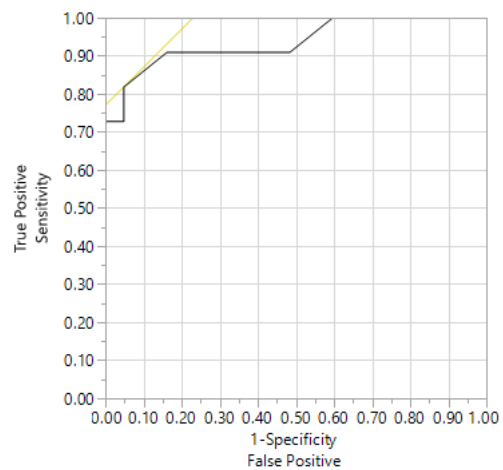

**ROC Table**

| X        | Prob   | 1-Specificity | Sensitivity | Sens-<br>(1-Spec) | True Pos | True Neg | False Pos | False Neg |
|----------|--------|---------------|-------------|-------------------|----------|----------|-----------|-----------|
| .        | .      | 0.0000        | 0.0000      | 0.0000            | 0        | 62       | 0         | 11        |
| 49.00000 | 1.0000 | 0.0000        | 0.0909      | 0.0909            | 1        | 62       | 0         | 10        |
| 44.00000 | 1.0000 | 0.0000        | 0.1818      | 0.1818            | 2        | 62       | 0         | 9         |
| 26.00000 | 0.9984 | 0.0000        | 0.2727      | 0.2727            | 3        | 62       | 0         | 8         |
| 20.00000 | 0.9769 | 0.0000        | 0.4545      | 0.4545            | 5        | 62       | 0         | 6         |
| 19.00000 | 0.9643 | 0.0000        | 0.5455      | 0.5455            | 6        | 62       | 0         | 5         |
| 16.00000 | 0.8747 | 0.0000        | 0.7273      | 0.7273            | 8        | 62       | 0         | 3         |
| 11.00000 | 0.4233 | 0.0323        | 0.7273      | 0.6950            | 8        | 60       | 2         | 3         |
| 9.00000  | 0.2297 | 0.0484        | 0.7273      | 0.6789            | 8        | 59       | 3         | 3         |
| 8.00000  | 0.1597 | 0.0484        | 0.8182      | 0.7698 *          | 9        | 59       | 3         | 2         |
| 7.00000  | 0.1080 | 0.1613        | 0.9091      | 0.7478            | 10       | 52       | 10        | 1         |
| 6.00000  | 0.0717 | 0.2258        | 0.9091      | 0.6833            | 10       | 48       | 14        | 1         |
| 5.00000  | 0.0469 | 0.2903        | 0.9091      | 0.6188            | 10       | 44       | 18        | 1         |
| 4.00000  | 0.0304 | 0.4839        | 0.9091      | 0.4252            | 10       | 32       | 30        | 1         |
| 3.00000  | 0.0196 | 0.5968        | 1.0000      | 0.4032            | 11       | 25       | 37        | 0         |
| 2.00000  | 0.0126 | 0.7903        | 1.0000      | 0.2097            | 11       | 13       | 49        | 0         |
| 1.00000  | 0.0081 | 0.9032        | 1.0000      | 0.0968            | 11       | 6        | 56        | 0         |
| 0.00000  | 0.0051 | 1.0000        | 1.0000      | 0.0000            | 11       | 0        | 62        | 0         |
| 0.00000  | 0.0051 | 1.0000        | 1.0000      | 0.0000            | 11       | 0        | 62        | 0         |
